# Supplementary material for: Minimal nucleotide duplex formation in water through enclathration in self-assembled hosts
Source: Springer Nature journal article supplement (doi:10.1038/nchem.100), 2009-02-22
Supplement: 41557_2009_BFnchem100_MOESM9_ESM.mol [file 41557_2009_BFnchem100_MOESM9_ESM.mol]

Untitled Document-2
  4887              3D

 64 68  0  0  1  0  0  0  0  0999 V2000
   -5.3027   -8.2465   -2.5278 C   0  0  0  0  0  0  0  0  0  0  0  0
   -5.5279   -7.2365   -1.5984 C   0  0  0  0  0  0  0  0  0  0  0  0
   -3.5486   -7.8889   -0.4025 C   0  0  0  0  0  0  0  0  0  0  0  0
   -3.4596   -9.0546   -1.1858 N   0  0  0  0  0  0  0  0  0  0  0  0
   -4.2534   -9.1415   -2.3455 C   0  0  0  0  0  0  0  0  0  0  0  0
   -4.0043   -9.9758   -3.1541 O   0  0  0  0  0  0  0  0  0  0  0  0
   -2.7990   -7.7683    0.5142 O   0  0  0  0  0  0  0  0  0  0  0  0
   -4.4882   -6.8648   -0.7131 N   0  0  0  0  0  0  0  0  0  0  0  0
   -2.6159   -5.0763   -0.5464 C   0  0  0  0  0  0  0  0  0  0  0  0
   -4.0607   -5.4680   -0.9103 C   0  0  1  0  0  0  0  0  0  0  0  0
   -4.1842   -5.1329   -2.3265 O   0  0  0  0  0  0  0  0  0  0  0  0
   -0.1916   -1.6552    1.5306 C   0  0  2  0  0  0  0  0  0  0  0  0
    0.4029   -2.5933    2.5685 C   0  0  0  0  0  0  0  0  0  0  0  0
    1.4846   -3.3417    1.7810 C   0  0  1  0  0  0  0  0  0  0  0  0
    1.6308   -2.6465    0.5298 O   0  0  0  0  0  0  0  0  0  0  0  0
   -1.5913   -1.5846    1.6740 O   0  0  0  0  0  0  0  0  0  0  0  0
    2.3935   -5.8248    5.7557 N   0  0  0  0  0  0  0  0  0  0  0  0
    2.1987   -6.3500    4.5242 C   0  0  0  0  0  0  0  0  0  0  0  0
    2.3426   -5.7488    3.3299 N   0  0  0  0  0  0  0  0  0  0  0  0
    2.7935   -4.4906    3.4817 C   0  0  0  0  0  0  0  0  0  0  0  0
    3.0987   -3.8474    4.6759 C   0  0  0  0  0  0  0  0  0  0  0  0
    2.8369   -4.5396    5.8665 C   0  0  0  0  0  0  0  0  0  0  0  0
    3.3187   -2.3641    3.1456 C   0  0  0  0  0  0  0  0  0  0  0  0
    3.5116   -2.5598    4.4383 N   0  0  0  0  0  0  0  0  0  0  0  0
    2.8825   -3.9040    7.1155 N   0  0  0  0  0  0  0  0  0  0  0  0
    2.7174   -3.4604    2.5545 N   0  0  0  0  0  0  0  0  0  0  0  0
   -6.0992   -8.2180   -3.8029 C   0  0  0  0  0  0  0  0  0  0  0  0
    0.2684   -2.2758    0.2235 C   0  0  2  0  0  0  0  0  0  0  0  0
    0.1756   -1.4000   -1.0154 C   0  0  0  0  0  0  0  0  0  0  0  0
   -1.1061   -0.7629   -1.0153 O   0  0  0  0  0  0  0  0  0  0  0  0
   -2.3080   -1.4258   -1.8368 P   0  0  1  0  0  0  0  0  0  0  0  0
   -1.7817   -1.7467   -3.3229 O   0  0  0  0  0  0  0  0  0  0  0  0
   -3.4167   -0.4982   -1.8532 O   0  0  0  0  0  0  0  0  0  0  0  0
   -3.0320   -4.4357   -2.8041 C   0  0  2  0  0  0  0  0  0  0  0  0
   -2.1749   -5.3434   -3.7038 C   0  0  0  0  0  0  0  0  0  0  0  0
   -1.1126   -4.5781   -4.2893 O   0  0  0  0  0  0  0  0  0  0  0  0
   -2.2935   -4.0109   -1.5722 C   0  0  1  0  0  0  0  0  0  0  0  0
   -2.8293   -2.7692   -1.1242 O   0  0  0  0  0  0  0  0  0  0  0  0
   -6.3223   -6.5151   -1.7791 H   0  0  0  0  0  0  0  0  0  0  0  0
   -2.7468   -9.6995   -1.0274 H   0  0  0  0  0  0  0  0  0  0  0  0
   -1.8910   -5.8913   -0.6746 H   0  0  0  0  0  0  0  0  0  0  0  0
   -2.5299   -4.7305    0.4952 H   0  0  0  0  0  0  0  0  0  0  0  0
   -4.7780   -4.8358   -0.3764 H   0  0  0  0  0  0  0  0  0  0  0  0
    0.2462   -0.6567    1.6772 H   0  0  0  0  0  0  0  0  0  0  0  0
    0.7871   -1.9732    3.3996 H   0  0  0  0  0  0  0  0  0  0  0  0
   -0.3234   -3.2887    2.9821 H   0  0  0  0  0  0  0  0  0  0  0  0
    1.1682   -4.3578    1.5152 H   0  0  0  0  0  0  0  0  0  0  0  0
   -1.7493   -1.0781    2.4849 H   0  0  0  0  0  0  0  0  0  0  0  0
    1.8358   -7.3719    4.5059 H   0  0  0  0  0  0  0  0  0  0  0  0
    3.3732   -1.3930    2.6574 H   0  0  0  0  0  0  0  0  0  0  0  0
    3.8374   -3.7144    7.3952 H   0  0  0  0  0  0  0  0  0  0  0  0
    2.3374   -3.0444    7.1226 H   0  0  0  0  0  0  0  0  0  0  0  0
   -6.6591   -7.2757   -3.8941 H   0  0  0  0  0  0  0  0  0  0  0  0
   -6.8093   -9.0510   -3.8508 H   0  0  0  0  0  0  0  0  0  0  0  0
   -5.4201   -8.2595   -4.6659 H   0  0  0  0  0  0  0  0  0  0  0  0
   -0.2878   -3.1940    0.0147 H   0  0  0  0  0  0  0  0  0  0  0  0
    0.9623   -0.6316   -1.0317 H   0  0  0  0  0  0  0  0  0  0  0  0
    0.2576   -2.0236   -1.9177 H   0  0  0  0  0  0  0  0  0  0  0  0
   -2.2549   -1.4744   -4.1271 H   0  0  0  0  0  0  0  0  0  0  0  0
   -3.4275   -3.5945   -3.3970 H   0  0  0  0  0  0  0  0  0  0  0  0
   -1.7248   -6.1822   -3.1463 H   0  0  0  0  0  0  0  0  0  0  0  0
   -2.7557   -5.7455   -4.5415 H   0  0  0  0  0  0  0  0  0  0  0  0
   -0.4845   -4.2934   -3.6006 H   0  0  0  0  0  0  0  0  0  0  0  0
   -1.2307   -3.8644   -1.7727 H   0  0  0  0  0  0  0  0  0  0  0  0
 10 43  1  0  0  0  0
  9 41  1  0  0  0  0
 13 46  1  0  0  0  0
 12 44  1  0  0  0  0
 36 63  1  0  0  0  0
 13 45  1  0  0  0  0
  2 39  1  0  0  0  0
  9 42  1  0  0  0  0
 27 55  1  0  0  0  0
  4 40  1  0  0  0  0
 35 62  1  0  0  0  0
 27 53  1  0  0  0  0
 29 58  1  0  0  0  0
 16 48  1  0  0  0  0
 35 61  1  0  0  0  0
 25 51  1  0  0  0  0
 18 49  1  0  0  0  0
 34 60  1  0  0  0  0
 37 64  1  0  0  0  0
 23 50  1  0  0  0  0
 28 56  1  0  0  0  0
 14 15  1  0  0  0  0
  1  2  2  0  0  0  0
  3  4  1  0  0  0  0
  4  5  1  0  0  0  0
  1  5  1  0  0  0  0
  5  6  2  0  0  0  0
  3  7  2  0  0  0  0
 37  9  1  0  0  0  0
  9 10  1  0  0  0  0
 10 11  1  0  0  0  0
 11 34  1  0  0  0  0
 37 34  1  0  0  0  0
 10  8  1  0  0  0  0
  8  2  1  0  0  0  0
  8  3  1  0  0  0  0
 12 13  1  0  0  0  0
 13 14  1  0  0  0  0
 15 28  1  0  0  0  0
 12 28  1  0  0  0  0
 12 16  1  0  0  0  0
 17 18  1  0  0  0  0
 18 19  2  0  0  0  0
 19 20  1  0  0  0  0
 20 21  2  0  0  0  0
 21 22  1  0  0  0  0
 31 38  1  0  0  0  0
 17 22  2  0  0  0  0
 23 24  2  0  0  0  0
 21 24  1  0  0  0  0
 22 25  1  0  0  0  0
 20 26  1  0  0  0  0
 23 26  1  0  0  0  0
 14 26  1  0  0  0  0
  1 27  1  0  0  0  0
 28 29  1  0  0  0  0
 30 29  1  0  0  0  0
 30 31  1  0  0  0  0
 31 32  1  0  0  0  0
 31 33  2  0  0  0  0
 34 35  1  0  0  0  0
 36 35  1  0  0  0  0
 37 38  1  0  0  0  0
 25 52  1  0  0  0  0
 29 57  1  0  0  0  0
 32 59  1  0  0  0  0
 14 47  1  0  0  0  0
 27 54  1  0  0  0  0
M  END
>  <energy>
159.5142663151322

$$$$
